# Supplementary material
Source: Springer Nature journal article supplement (https://www.springermedizin.de/resource/supplementary/12936_2007_552_MOESM4_ESM.pdf/9548272)

log monthly cases

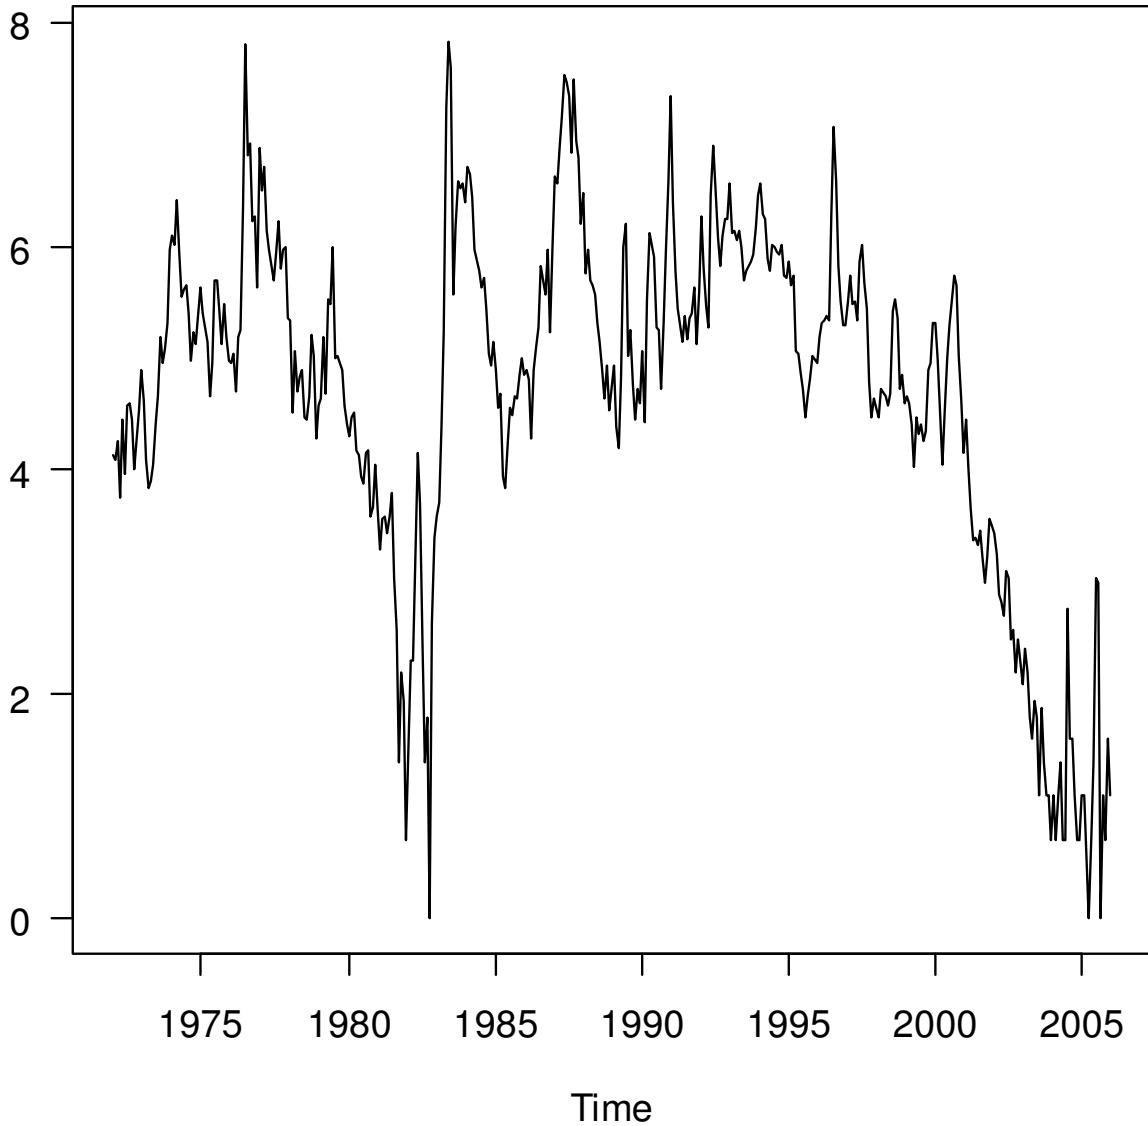

Supplement: MOESM4 [file 9548272]
